# Supplementary material for: Two-dimensional decanuclear erbium wheel supported by mixed hemimellitate and 4-chlorobenzoate ligands
Source: Royal Society of Chemistry journal article supplement (doi:10.1039/c2ce25526j), 2012-01-01
Supplement: c2ce25526j.pdf [file c2ce25526j.pdf]

## Two-dimensional decanuclear erbium wheel supported by mixed hemimellitate and 4-chlorobenzoate ligands

Xinfa Li,<sup>a,b</sup> Yuanbiao Huang,<sup>a</sup> and Rong Cao<sup>a,\*</sup>

<sup>a</sup>State Key Laboratory of Structural Chemistry, Fujian Institute of Research on the Structure of Matter, Chinese Academy of Sciences, Fuzhou, 350002, P. R. China.

<sup>b</sup>Department of Chemistry, Zunyi Normal College, Zunyi, 563002, P. R. China.

\*Corresponding author: (email: [rcao@fjirsm.ac.cn](mailto:rcao@fjirsm.ac.cn))

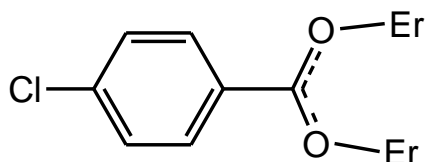

syn, syn-CO<sub>2</sub><sup>-</sup>

**Scheme S1.** Coordination mode of cba ligands exhibited in **1**.

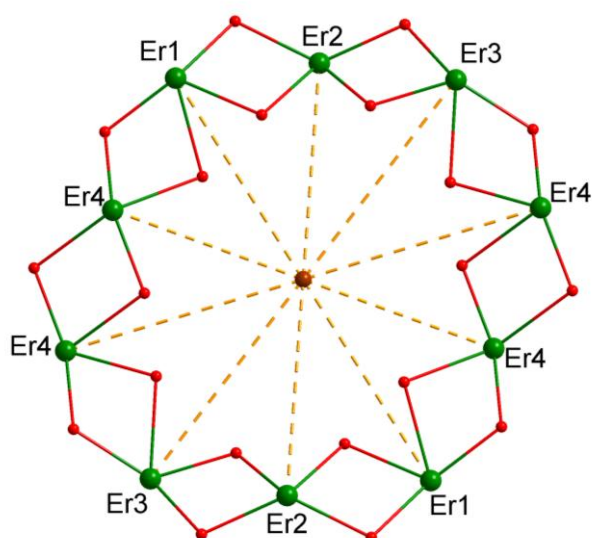

Electronic supplementary information

**Figure S1.** Perspective view of the decanuclear [Er<sub>10</sub>] wheel in **1**. The inversion center is drawn as a brown ball. The distances between two identical Er (III) ions (Å): Er(1)-Er(1) = 12.333, Er(2)-Er(2) = 11.722, Er(3)-Er(3) = 12.933, Er(4)-Er(4) = 12.763, Er(4)-Er(4) = 10.428.

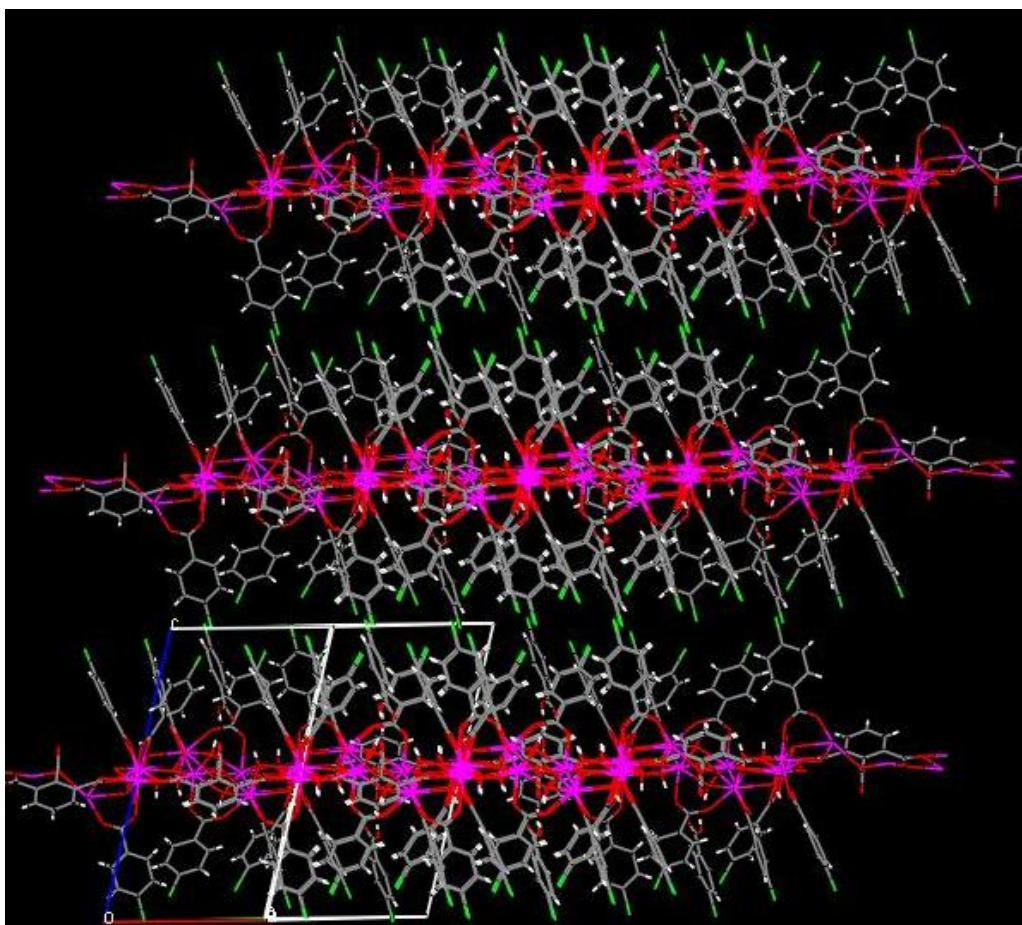

**Figure S2.** View of the 3D packing diagram of **1** along *b*-axis.

Electronic supplementary information

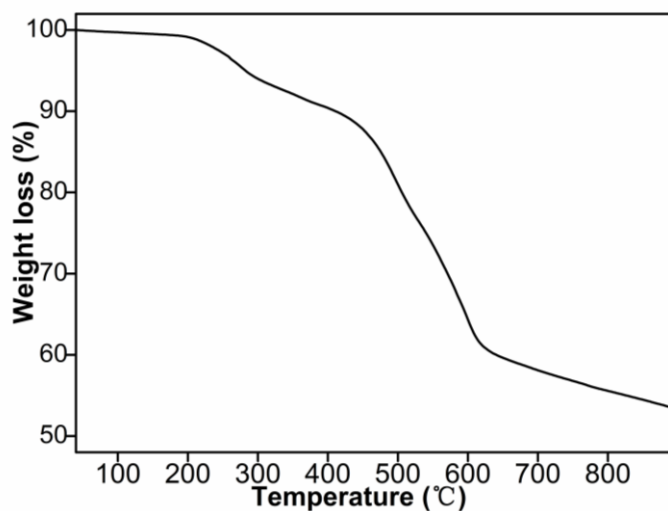

Figure S3. Thermogravimetric analysis (TGA) curve of **1**.

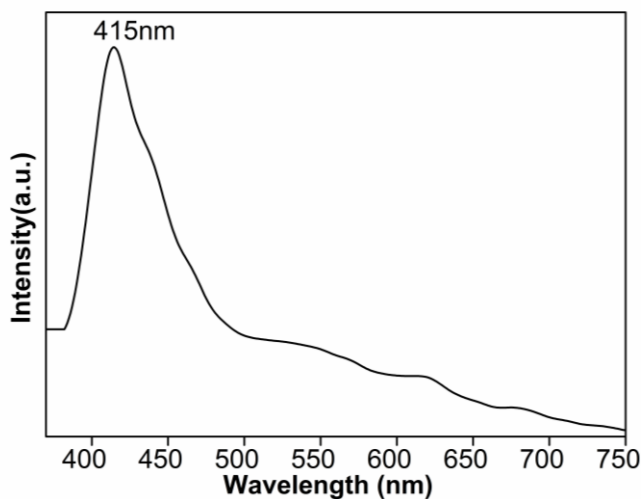

Figure S4. PL emission spectrum of **1** ( $\lambda_{\text{ex}} = 360\text{nm}$ ).

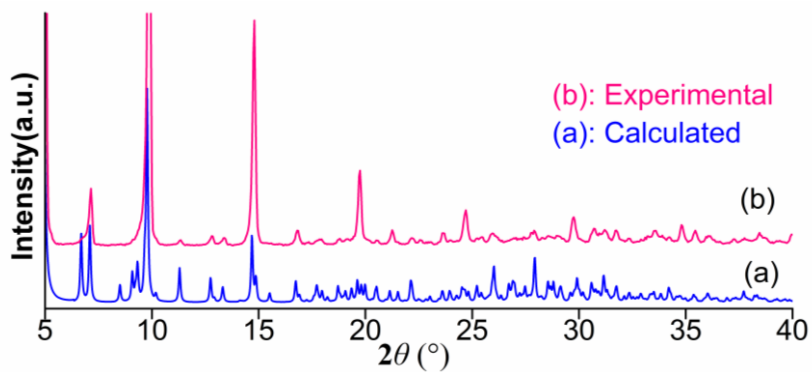

Figure S5. Experimental and calculated XRD patterns of **1**.
